# Supplementary material
Source: publisher figshare collection journal article supplement (https://asha.figshare.com/articles/dataset/_/16840204)
Supplement: Supplementary file 1 [file 1]

### Supplemental Material S3. Example codebook for open-ended question on barriers.

#### Theme: Patient-Environment Dynamic

| Category                             | Definition                                                                                                                                                                                                                                                                                                                                                                                                                                                                                           |               |                    |                                     |                                                                                                                                                                                                                                                 |                          |                                                                                                                                                                    |
|--------------------------------------|------------------------------------------------------------------------------------------------------------------------------------------------------------------------------------------------------------------------------------------------------------------------------------------------------------------------------------------------------------------------------------------------------------------------------------------------------------------------------------------------------|---------------|--------------------|-------------------------------------|-------------------------------------------------------------------------------------------------------------------------------------------------------------------------------------------------------------------------------------------------|--------------------------|--------------------------------------------------------------------------------------------------------------------------------------------------------------------|
| <i><b>Environment Support</b></i>    | Physical and emotional support from the external environment, including caregiver and technology support.                                                                                                                                                                                                                                                                                                                                                                                            |               |                    |                                     |                                                                                                                                                                                                                                                 |                          |                                                                                                                                                                    |
|                                      | <table> <tr> <th>Subcategories</th><th>Exemplary response</th></tr> <tr> <td>Limited family or caregiver support</td><td> <p><i>"Individuals who lack family/partner support outside the clinic."</i></p> <p><i>"Poor family support."</i></p> <p><i>"Willingness of family members or education level of family members following through with recommendations."</i></p> </td></tr> <tr> <td>External resources</td><td><i>"No access to computer or iPad."</i></td></tr> </table>                  | Subcategories | Exemplary response | Limited family or caregiver support | <p><i>"Individuals who lack family/partner support outside the clinic."</i></p> <p><i>"Poor family support."</i></p> <p><i>"Willingness of family members or education level of family members following through with recommendations."</i></p> | External resources       | <i>"No access to computer or iPad."</i>                                                                                                                            |
| Subcategories                        | Exemplary response                                                                                                                                                                                                                                                                                                                                                                                                                                                                                   |               |                    |                                     |                                                                                                                                                                                                                                                 |                          |                                                                                                                                                                    |
| Limited family or caregiver support  | <p><i>"Individuals who lack family/partner support outside the clinic."</i></p> <p><i>"Poor family support."</i></p> <p><i>"Willingness of family members or education level of family members following through with recommendations."</i></p>                                                                                                                                                                                                                                                      |               |                    |                                     |                                                                                                                                                                                                                                                 |                          |                                                                                                                                                                    |
| External resources                   | <i>"No access to computer or iPad."</i>                                                                                                                                                                                                                                                                                                                                                                                                                                                              |               |                    |                                     |                                                                                                                                                                                                                                                 |                          |                                                                                                                                                                    |
| Category                             | Definition                                                                                                                                                                                                                                                                                                                                                                                                                                                                                           |               |                    |                                     |                                                                                                                                                                                                                                                 |                          |                                                                                                                                                                    |
| <i><b>Person-related Factors</b></i> | Any factors associated with the person self that would impact on the home practice outcome.                                                                                                                                                                                                                                                                                                                                                                                                          |               |                    |                                     |                                                                                                                                                                                                                                                 |                          |                                                                                                                                                                    |
|                                      | <table> <tr> <th>Subcategories</th><th>Exemplary response</th></tr> <tr> <td>Motivation</td><td> <p><i>"Client motivation to practice is main barrier."</i></p> <p><i>"Patients who lack motivation to complete work outside the therapy room."</i></p> </td></tr> <tr> <td>Impairment/comorbidities</td><td> <p><i>"Severity of aphasia."</i></p> <p><i>"Pt understanding of what is assigned to do."</i></p> <p><i>Working memory deficits</i></p> <p><i>"Depression."</i></p> </td></tr> </table> | Subcategories | Exemplary response | Motivation                          | <p><i>"Client motivation to practice is main barrier."</i></p> <p><i>"Patients who lack motivation to complete work outside the therapy room."</i></p>                                                                                          | Impairment/comorbidities | <p><i>"Severity of aphasia."</i></p> <p><i>"Pt understanding of what is assigned to do."</i></p> <p><i>Working memory deficits</i></p> <p><i>"Depression."</i></p> |
| Subcategories                        | Exemplary response                                                                                                                                                                                                                                                                                                                                                                                                                                                                                   |               |                    |                                     |                                                                                                                                                                                                                                                 |                          |                                                                                                                                                                    |
| Motivation                           | <p><i>"Client motivation to practice is main barrier."</i></p> <p><i>"Patients who lack motivation to complete work outside the therapy room."</i></p>                                                                                                                                                                                                                                                                                                                                               |               |                    |                                     |                                                                                                                                                                                                                                                 |                          |                                                                                                                                                                    |
| Impairment/comorbidities             | <p><i>"Severity of aphasia."</i></p> <p><i>"Pt understanding of what is assigned to do."</i></p> <p><i>Working memory deficits</i></p> <p><i>"Depression."</i></p>                                                                                                                                                                                                                                                                                                                                   |               |                    |                                     |                                                                                                                                                                                                                                                 |                          |                                                                                                                                                                    |

|                  | Emotional responses and attitudes                           | <p><i>"Fatigue or generally poor health."</i></p> <p><i>"Frustration with slower than expected progress."</i></p> <p><i>"HEP due to stressors associated with recent life change causing the aphasia (e.g. stroke, no longer able to work, needing to sell house to afford medical needs)."</i></p> <p><i>"Realistic expectations."</i></p> |
|------------------|-------------------------------------------------------------|---------------------------------------------------------------------------------------------------------------------------------------------------------------------------------------------------------------------------------------------------------------------------------------------------------------------------------------------|
|                  | Socioeconomic status                                        | <i>"Patient's socioeconomic status plays a big factor in the patient completing an HEP."</i>                                                                                                                                                                                                                                                |
| Category         | Definition                                                  | Exemplary response                                                                                                                                                                                                                                                                                                                          |
| <i>Adherence</i> | The extent of the person completing assigned home practice. | <p><i>"Difficulty with compliance."</i></p> <p><i>"Consistency in use if minimal support system in place."</i></p>                                                                                                                                                                                                                          |

### Theme: Clinic logistics

| Category                          | Definition                                                                      | Exemplary response                                                                                                                                                                                                                                                                                                                                                                                                           |
|-----------------------------------|---------------------------------------------------------------------------------|------------------------------------------------------------------------------------------------------------------------------------------------------------------------------------------------------------------------------------------------------------------------------------------------------------------------------------------------------------------------------------------------------------------------------|
| <i>Time</i>                       | Available time for the clinicians to create and follow up home practice program | <p><i>"There's not enough time in my daily schedule to make a personalized home program."</i></p> <p><i>"Time limitations for explicit instruction and practice with patient before sending home."</i></p>                                                                                                                                                                                                                   |
| <i>Transfer and Communication</i> | Communication with family and other professionals                               | <p><i>"Low staff to patient ratio therefore limited time. Low likelihood of carryover for some nurse aides, nurses, and family members. Perhaps limited "visibility" from admin staff, which may be related to more emphasis in PT/OT support and less on ST."</i></p> <p><i>"The top barrier is making sure the information makes it home during the transition from the acute care setting to next level of care."</i></p> |

|                  |                                                                     |                                                                                            |
|------------------|---------------------------------------------------------------------|--------------------------------------------------------------------------------------------|
| <b>Resources</b> | Available resources for clinicians to create home practice programs | <i>"I don't want to spend money on materials."</i>                                         |
|                  |                                                                     | <i>"Lack of tools to develop functional plans."</i>                                        |
|                  |                                                                     | <i>"Access to high quality materials."</i>                                                 |
| <b>Billing</b>   | Non-billability of the HEP                                          | <i>"Lack of AAC practitioners due to poor insurance reimbursement/coverage"</i>            |
|                  |                                                                     | <i>"Zero time allotted in my day for something the hospital can't bill insurance for."</i> |

### Theme: Home Program Creation/Adaptation

| Definition                                                                | Exemplary response                                                                  |
|---------------------------------------------------------------------------|-------------------------------------------------------------------------------------|
| Clinician's self-perceived barriers in creating and adapting home program | <i>"My own lack of creativity in thinking of appropriate activities."</i>           |
|                                                                           | <i>"Constantly coming up with new/appropriate stimuli, keeping programs fresh."</i> |
|                                                                           | <i>"I wish I had more experience/knowledge about different home exercise."</i>      |
