# Supplementary material
Source: publisher figshare collection journal article supplement (https://asha.figshare.com/articles/dataset/_/16840204)
Supplement: Supplementary file 2 [file 1]

## **Supplemental Material S1. Copy of survey.**

### **Informed Consent**

You are invited to participate in this survey if you are meet the following criteria:

- 1) are an ASHA certified speech-language pathologist
- 2) as part of your clinical practice at least 30% of the clients you serve have post-stroke aphasia, even if you are not actively addressing their aphasia
- 3) have created at least two home practice programs for clients with aphasia in the last 3 months

**PURPOSE:** We are conducting a survey to investigate methods speech-language pathologists (SLPs) working with individuals with post-stroke aphasia use when creating and implementing home practice programs to improve language. A home practice program can be defined as exercises or activities that you recommend to a client to complete outside of direct intervention.

Survey completion will take approximately 15 to 20 minutes. You will answer 37 multiple choice and open-ended questions to provide information about your design of home practice programs, the technology you use in home practice programs, as well as facilitators and barriers to the implementation of home practice programs. The responses will be analyzed for content, to describe speech-language pathologist practice regarding home practice programs in this population. These are the only requests that will be made of you. You are under no obligation to participate in this study.

**RISKS AND BENEFITS:** Risks are minimal and are related to potential inconvenience in taking the time to complete the survey. Although you may not directly benefit from participation, your contribution will assist the field of speech-language pathology in increasing understanding of home program implementation.

**COMPENSATION:** Upon completion of the survey, you can provide your e-mail address to be entered into a drawing to win one of twenty, \$20 gift cards.

**CONFIDENTIALITY:** Security for the online surveys will be SSL and encrypted. Your name will never appear on any individual survey, research instrument, or in the data analysis. All written summaries and reports of these data including consent assessments will be stored in a locked file in the researcher's office. Electronic copies of the data will be stored on a password protected computer in a locked office of the primary investigator. Your response(s) will only appear in statistical data and/or narrative summaries. All written and electronic materials will be destroyed at the completion of the research. Your e-mail and your survey data will be separated to maintain confidentiality.

**RIGHT TO WITHDRAW:** You are under no obligation to participate in this study. You are free to withdraw your consent to participate at any time.

**VOLUNTARY CONSENT:** I have read the above statements and understand what is being requested of me. I also understand that my participation is voluntary and that I am free to

withdraw my consent at any time, for any reason by not completing the survey. On these terms, I certify that I am willing to participate in this research project.

I understand that should I have further questions about my participation I can contact Dr. Elena Donoso Brown at 412-396-5450.

**I consent, begin the study**

**I do not consent, I do not wish to participate**

## Demographics

Are you an ASHA certified speech language pathologist?

YES

NO

As part of your clinical practice, do at least 30% of the clients you serve have post-stroke aphasia? Note: This includes individuals who have aphasia even if you are not actively addressing their aphasia.

YES

NO

Have you created at least two home practice programs for clients with aphasia in the last 3 months?

Note: A home practice program can be defined as exercises or activities that you recommend to a client to complete outside of direct intervention.

YES

NO

Select your primary practice setting. Please only choose one.

Acute Care

Inpatient Rehabilitation

Outpatient Clinic

Home Care

Skilled Nursing Facility

\_\_\_\_\_ Other (please specify)

Years of experience as a speech-language pathologist.

0-2

3-5

6-10

11-20

> 20

Years of experience in **current** practice setting.

0-2

3-5

6-10

11-20  
> 20

For how many of your clients with aphasia do you create home practice programs?

Note: A home practice program can be defined as exercises or activities that you recommend to a client to complete outside of direct intervention.

1-25% of my clients with aphasia  
26-50% of my clients with aphasia  
51-75% of my clients with aphasia  
76-99% of my clients with aphasia  
All of my clients with aphasia

### **Interventions**

Which areas of language do you create the most home practice programs for?

Reading comprehension  
Auditory comprehension  
Spoken expression  
Written expression  
\_\_\_\_\_ other

When creating a home practice program for a person with aphasia, what are the three interventions or activities that you use most often to improve any aspect of language?

- 1.
- 2.
- 3.

### **Home Practice Instruction**

Below are several strategies that clinicians could use to instruct clients for home practice programs. Please identify how often you use each method with your clients with aphasia when instructing them on a home practice program.

Paper handout

Never  
1-25% of the time

26-50% of the time  
51-75% of the time  
76-99% of the time  
Always

Electronic handout

Never  
1-25% of the time  
26-50% of the time  
51-75% of the time  
76-99% of the time  
Always

Video recording

Never  
1-25% of the time  
26-50% of the time  
51-75% of the time  
76-99% of the time  
Always

Visual demonstration

Never  
1-25% of the time  
26-50% of the time  
51-75% of the time  
76-99% of the time  
Always

Guided practice of home practice activities

Never  
1-25% of the time  
26-50% of the time  
51-75% of the time  
76-99% of the time  
Always

Discussion regarding how recommendations will fit into everyday routine

Never  
1-25% of the time  
26-50% of the time

51-75% of the time

76-99% of the time

Always

Other strategies, please specify with frequency of use.

What are the top factors that have facilitated **your experience** in creating and implementing home practice programs for people with aphasia?

What are the top barriers that **you experience** related to creating and implementing home practice programs for people with aphasia?

## **Technology**

How often do you use the following applications of technology as a part of your home practice programs for people with aphasia?

Mobile applications (e.g., Tactus Therapy, Constant Therapy)

Never

1-25% of the time

26-50% of the time

51-75% of the time

76-99% of the time

Always

Computer Programs (e.g., Attention Process Training III, Bungalow)

Never

1-25% of the time

26-50% of the time  
51-75% of the time  
76-99% of the time  
Always

Video Conferencing (e.g., Skype, Facetime)

Never  
1-25% of the time  
26-50% of the time  
51-75% of the time  
76-99% of the time  
Always

Telephone/cellphone call

Never  
1-25% of the time  
26-50% of the time  
51-75% of the time  
76-99% of the time  
Always

Text message

Never  
1-25% of the time  
26-50% of the time  
51-75% of the time  
76-99% of the time  
Always

E-mail

Never  
1-25% of the time  
26-50% of the time  
51-75% of the time  
76-99% of the time  
Always

## Adherence

On average, how often would you say that clients adhere to the home practice programs you create for them?

Never

1-25% of the time

26-50% of the time

51-75% of the time

76-99% of the time

Always

On average, how frequently do you check in with your client regarding adherence to the recommend home practice program prior to discharge from service?

At every session

After every two sessions

After every three to five sessions

After every five or more sessions

I do not have an opportunity to follow-up

\_\_\_\_\_ Other

The following are methods that could be used to support adherence to home practice programs. Please identify, on average, how often (i.e., percent of time) you use each method for your clients with aphasia when designing a home program.

Logbook, journal, or diary to record practice

Never

1-25% of the time

26-50% of the time

51-75% of the time

76-99% of the time

Always

Mobile application to record practice

Never

1-25% of the time

26-50% of the time

51-75% of the time

76-99% of the time

Always



Computer program that tracks practice

Never

1-25% of the time

26-50% of the time

51-75% of the time

76-99% of the time

Always

Incentive chart

Never

1-25% of the time

26-50% of the time

51-75% of the time

76-99% of the time

Always

Behavioral contract

Never

1-25% of the time

26-50% of the time

51-75% of the time

76-99% of the time

Always

Other (specify strategy and frequency)

For people with aphasia engaged in a home practice program, please select the top three factors that you believe **support** adherence to the home practice program.

Personal motivation

Peer support

Supportive family member/spouse/caregiver

Therapist or other healthcare provider professional encouragement

Application of technology

Ability to see/monitor progress

Rehabilitation team collaboration

\_\_\_\_\_ Other

For people with aphasia engaged in a home practice program, please select the top three of the following factors that you believe **prevent or limit** adherence to the home program.

Lack of knowledge regarding home program purpose

Frustration

Lack of time

Cognitive impairment

Low motivation

Lack of family member/caregiver support

Language impairment

Mental health conditions (e.g., depression)

Comfort with technology

\_\_\_\_\_ Other, please specify

What region of the country do you practice in?

See map below for reference.

West

Midwest

Northeast

South

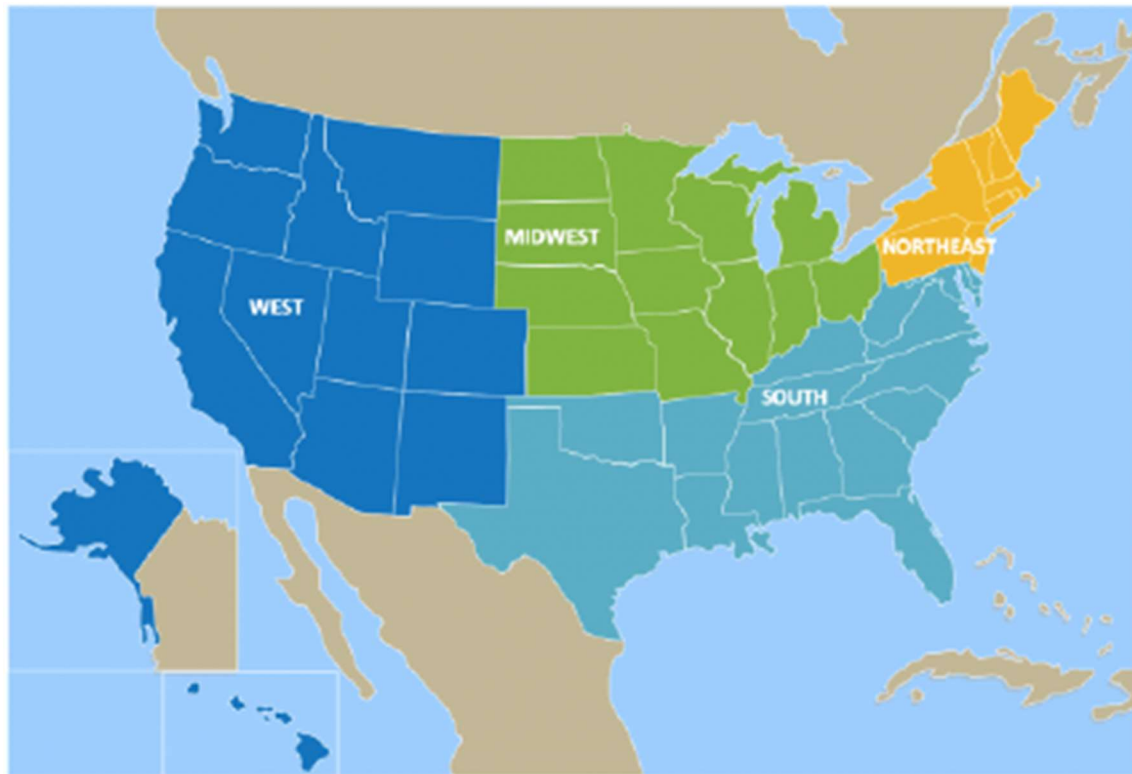

Over the past year, on average, how often did you utilize research databases (i.e., PubMed, CINAHL, Google Scholar) to search for new evidence to support your practice?

Once a week  
Once every two weeks  
Once a month  
Once every two months  
Once every six months  
Once in the last year  
Not at all

What is your age?

18-24 years  
25-34 years  
35-44 years  
45-54 years  
55-64 years  
65-74 years  
75 years or older

What is your gender?

Male  
Female  
Non-binary/third gender  
Prefer to self-describe \_\_\_\_\_

If you have any other comments, please feel free to write them in the text box below.
