# Supplementary material
Source: publisher figshare collection journal article supplement (https://asha.figshare.com/articles/dataset/_/16840204)
Supplement: Supplementary file 3 [file 1]

## Supplemental Material S2. Example codebook for open-ended question on facilitators.

| Theme: Home Program Design             |                                                                                                                                                         |                                                                                                                  |
|----------------------------------------|---------------------------------------------------------------------------------------------------------------------------------------------------------|------------------------------------------------------------------------------------------------------------------|
| Category                               | Definition                                                                                                                                              |                                                                                                                  |
| <b><i>Client-Centered Practice</i></b> | Identified responses that the home program is based on a person's motivation and interests, or involving functional task that is related to the person. |                                                                                                                  |
|                                        | Subcategories                                                                                                                                           | Exemplary response                                                                                               |
|                                        | Personalization                                                                                                                                         | <i>"Making of interest to patient"</i>                                                                           |
|                                        |                                                                                                                                                         | <i>"Creating a routine with the patient that will work on THEIR terms in alignment with their goals."</i>        |
|                                        | Just-right challenge                                                                                                                                    | <i>"Activities they can do on their own, varied activities to prevent boredom."</i>                              |
| <b><i>Functional Practice</i></b>      |                                                                                                                                                         | <i>"Finding a balance and ensuring task is challenging but not too challenging, leading them to abort task."</i> |
|                                        | Incorporating feedback                                                                                                                                  | <i>"Pt's responses, how often they actually work on the material given or suggested."</i>                        |
|                                        |                                                                                                                                                         | <i>"Pt's responses, how often they actually work on the material given or suggested."</i>                        |
| Category                               | Definition                                                                                                                                              |                                                                                                                  |
| <b><i>Functional Practice</i></b>      | Function-based activities                                                                                                                               | <i>"Providing functional activities targeted toward patient's daily routines."</i>                               |
|                                        |                                                                                                                                                         | <i>"Functional homework."</i>                                                                                    |

| Category                                      | Definition                                                                           |                                                                                                                                                                                                  |
|-----------------------------------------------|--------------------------------------------------------------------------------------|--------------------------------------------------------------------------------------------------------------------------------------------------------------------------------------------------|
| <b><i>Home Practice Program Structure</i></b> | Formats or structures that are used when delivering the home practice program.       |                                                                                                                                                                                                  |
|                                               | Subcategories                                                                        | Exemplary response                                                                                                                                                                               |
|                                               | Assessment for home programs                                                         | <p><i>"Attentive listening and observation."</i></p> <p><i>"A semi-structured interview with the client at the start of the session."</i></p>                                                    |
|                                               | Education                                                                            | <i>"A reflective/meta-linguistic approach needs to be the foundation. I spend a great deal of time educating clients about all aspects of their treatment."</i>                                  |
|                                               | Timing                                                                               | <i>"The ability to schedule more intensive/frequent direct sessions early in the course of care."</i>                                                                                            |
|                                               | Material                                                                             | <p><i>"Having a template of some kind such as a word document, PowerPoint."</i></p> <p><i>"Keeping all previous home programs to personalize and tweak for other persons in the future."</i></p> |
| Category                                      | Definition                                                                           | Exemplary response                                                                                                                                                                               |
| <b><i>Carry-over/repetition</i></b>           | Importance of repetitive practice or carry over the session in the in-person session | <p><i>"Carryover improved with home program use."</i></p> <p><i>"Carryover and maintenance of newly learned skills between sessions."</i></p>                                                    |

### Theme: Patient-Environment Dynamic

| Category                          | Definition                                                                                                                                                                                                                                                                                                                                                                                                                                                                                                                                                                                                       |               |                    |                            |                                                                                                                                                                                                                                                                       |                  |                                                                                                                                                         |
|-----------------------------------|------------------------------------------------------------------------------------------------------------------------------------------------------------------------------------------------------------------------------------------------------------------------------------------------------------------------------------------------------------------------------------------------------------------------------------------------------------------------------------------------------------------------------------------------------------------------------------------------------------------|---------------|--------------------|----------------------------|-----------------------------------------------------------------------------------------------------------------------------------------------------------------------------------------------------------------------------------------------------------------------|------------------|---------------------------------------------------------------------------------------------------------------------------------------------------------|
| <b><i>Environment Support</i></b> | Physical and emotional support from the external environment, including caregiver and technology support.                                                                                                                                                                                                                                                                                                                                                                                                                                                                                                        |               |                    |                            |                                                                                                                                                                                                                                                                       |                  |                                                                                                                                                         |
|                                   | <table> <tr> <th>Subcategories</th><th>Exemplary response</th></tr> <tr> <td>Family support/involvement</td><td> <p><i>"Availability of caregiver support and participation in meetings/sessions."</i></p> <p><i>"Caregiver support in the community setting."</i></p> <p><i>"I have to consider if there is an available caregiver to assist with the home exercise program."</i></p> </td></tr> <tr> <td>External support</td><td> <p><i>"Accessibility to technology."</i></p> <p><i>"A patient's smart phone or tablet. Also TalkPath Therapy account as supplemental practice."</i></p> </td></tr> </table> | Subcategories | Exemplary response | Family support/involvement | <p><i>"Availability of caregiver support and participation in meetings/sessions."</i></p> <p><i>"Caregiver support in the community setting."</i></p> <p><i>"I have to consider if there is an available caregiver to assist with the home exercise program."</i></p> | External support | <p><i>"Accessibility to technology."</i></p> <p><i>"A patient's smart phone or tablet. Also TalkPath Therapy account as supplemental practice."</i></p> |
| Subcategories                     | Exemplary response                                                                                                                                                                                                                                                                                                                                                                                                                                                                                                                                                                                               |               |                    |                            |                                                                                                                                                                                                                                                                       |                  |                                                                                                                                                         |
| Family support/involvement        | <p><i>"Availability of caregiver support and participation in meetings/sessions."</i></p> <p><i>"Caregiver support in the community setting."</i></p> <p><i>"I have to consider if there is an available caregiver to assist with the home exercise program."</i></p>                                                                                                                                                                                                                                                                                                                                            |               |                    |                            |                                                                                                                                                                                                                                                                       |                  |                                                                                                                                                         |
| External support                  | <p><i>"Accessibility to technology."</i></p> <p><i>"A patient's smart phone or tablet. Also TalkPath Therapy account as supplemental practice."</i></p>                                                                                                                                                                                                                                                                                                                                                                                                                                                          |               |                    |                            |                                                                                                                                                                                                                                                                       |                  |                                                                                                                                                         |

| Category                             | Definition                                                                                                                                                                                                                                                                                                                                                                                                                                                                             |               |                    |            |                                                                                                                                              |                          |                                                                                                                                                                |
|--------------------------------------|----------------------------------------------------------------------------------------------------------------------------------------------------------------------------------------------------------------------------------------------------------------------------------------------------------------------------------------------------------------------------------------------------------------------------------------------------------------------------------------|---------------|--------------------|------------|----------------------------------------------------------------------------------------------------------------------------------------------|--------------------------|----------------------------------------------------------------------------------------------------------------------------------------------------------------|
| <b><i>Person-related Factors</i></b> | Any factors associated with the person self that would impact on the home practice outcome.                                                                                                                                                                                                                                                                                                                                                                                            |               |                    |            |                                                                                                                                              |                          |                                                                                                                                                                |
|                                      | <table> <tr> <th>Subcategories</th><th>Exemplary response</th></tr> <tr> <td>Motivation</td><td> <p><i>"High level of motivation in the person receiving care."</i></p> <p><i>"People are interested in having something to work on."</i></p> </td></tr> <tr> <td>Impairment/comorbidities</td><td> <p><i>"Severity of aphasia."</i></p> <p><i>"Cognitive ability to navigate electronic devices on which programs are built; client awareness of errors."</i></p> </td></tr> </table> | Subcategories | Exemplary response | Motivation | <p><i>"High level of motivation in the person receiving care."</i></p> <p><i>"People are interested in having something to work on."</i></p> | Impairment/comorbidities | <p><i>"Severity of aphasia."</i></p> <p><i>"Cognitive ability to navigate electronic devices on which programs are built; client awareness of errors."</i></p> |
| Subcategories                        | Exemplary response                                                                                                                                                                                                                                                                                                                                                                                                                                                                     |               |                    |            |                                                                                                                                              |                          |                                                                                                                                                                |
| Motivation                           | <p><i>"High level of motivation in the person receiving care."</i></p> <p><i>"People are interested in having something to work on."</i></p>                                                                                                                                                                                                                                                                                                                                           |               |                    |            |                                                                                                                                              |                          |                                                                                                                                                                |
| Impairment/comorbidities             | <p><i>"Severity of aphasia."</i></p> <p><i>"Cognitive ability to navigate electronic devices on which programs are built; client awareness of errors."</i></p>                                                                                                                                                                                                                                                                                                                         |               |                    |            |                                                                                                                                              |                          |                                                                                                                                                                |

*"I believe premorbid social skills also impacts the patient's motivation to complete HEP"*

*"Level of fine motor and visual function."*

*"Length of stay in acute care, next level of care/therapy."*

### Theme: Evidence-based Practice

| Category                                        | Definition                                                                                                | Exemplary response                                                                                                                                                                                                                                                                                                                                      |
|-------------------------------------------------|-----------------------------------------------------------------------------------------------------------|---------------------------------------------------------------------------------------------------------------------------------------------------------------------------------------------------------------------------------------------------------------------------------------------------------------------------------------------------------|
| <b><i>Research and Online Resources</i></b>     | Using database or online resources to support evidence-based practice.                                    | <p><i>"Research, ASHA website."</i></p> <p><i>"My knowledge through CEUs and online reading."</i></p> <p><i>"Sharing of resource libraries."</i></p>                                                                                                                                                                                                    |
| <b><i>Clinical Experience of Colleagues</i></b> | Gain knowledge through advanced practitioners' or peers' experience.                                      | <p><i>"Discussion with colleagues."</i></p> <p><i>"Suggestions from other clinicians."</i></p>                                                                                                                                                                                                                                                          |
| <b><i>Person Clinical Experience</i></b>        | Improve practice through exposure to the practice, including volunteering, personal experience, and work. | <p><i>"Making mistakes."</i></p> <p><i>"Time in the field working with this population developed an understanding of client needs."</i></p> <p><i>"My extensive volunteer experience with a top aphasia therapist and researcher prior to graduating and beginning my career as an SLP. My building upon prior experience and prior successes."</i></p> |
